# Supplementary material for: The Impact of Tobacco Smoking on Adult Asthma Outcomes
Source: PubMed Central journal article supplement (PMC7908240; doi:10.3390/ijerph18030992), 2021-01-23
Supplement: ijerph-18-00992-s001.pdf [file ijerph-18-00992-s001.pdf]

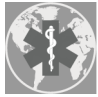

## Supplementary Material

**Table 1.** Clinical characteristics of subjects with BMI >25 kg/m<sup>2</sup> according to smoking status.

|                                  | NS<br>(n = 45) | <i>p</i><br>NS vs FS | FS<br>(n = 27) | <i>p</i><br>FS vs CS | CS<br>(n = 27) | <i>p</i><br>NS vs CS | <i>p</i><br>NS vs FS vs CS |
|----------------------------------|----------------|----------------------|----------------|----------------------|----------------|----------------------|----------------------------|
| <b>Gender (male)</b>             | 19 (42%)       | 0.430                | 14 (52%)       | 0.590                | 12 (44%)       | 0.850                | 0.720                      |
| <b>Age (years)</b>               | 42 ± 13        | <b>0.024</b>         | 49 ± 11        | 0.180                | 54 ± 15        | <b>0.002</b>         | <b>0.001</b>               |
| <b>BMI (kg/m<sup>2</sup>)</b>    | 31 ± 6         | 0.270                | 31 ± 5         | 0.930                | 32 ± 6         | 0.230                | 0.720                      |
| <b>Family history</b>            |                |                      |                |                      |                |                      |                            |
| <i>n</i> (%)                     |                |                      |                |                      |                |                      |                            |
| Asthma                           | 10 (22%)       | 0.710                | 5 (19%)        | 0.130                | 10 (37%)       | 0.170                | 0.240                      |
| Atopy                            | 8 (18%)        | 0.240                | 8 (30%)        | 0.340                | 5 (19%)        | 1.0                  | 0.450                      |
| <b>Personal atopy</b>            |                |                      |                |                      |                |                      |                            |
| <i>n</i> (%)                     | 18 (40%)       | 0.800                | 10 (37%)       | 0.230                | 6 (22%)        | 0.120                | 0.290                      |
| <b>Number of pack-year</b>       | 0              | <b>&lt;0.001</b>     | 10.5 ± 7.5     | 0.750                | 11.6 ± 9       | <b>&lt;0.001</b>     | <b>&lt;0.001</b>           |
| <b>Asthma onset <i>n</i> (%)</b> |                |                      |                |                      |                |                      |                            |
| Childhood                        | 18 (40%)       | 0.280                | 4 (15%)        | 0.170                | 9 (33%)        | 0.280                | 0.080                      |
| Adult                            | 27 (60%)       |                      | 23 (85%)       |                      | 18 (67%)       |                      |                            |
| <b>Dyspnea</b>                   |                |                      |                |                      |                |                      |                            |
| Presence <i>n</i> (%)            | 19 (42%)       | <b>0.001</b>         | 22 (81%)       | <b>0.021</b>         | 14 (52%)       | 0.430                | <b>0.005</b>               |
| Degree mMRC                      | 1.3 ± 1.1      | 0.632                | 1.8 ± 0.9      | 0.764                | 1.6 ± 1.2      | 0.555                | 0.780                      |
| <b>Asthma Control</b>            |                |                      |                |                      |                |                      |                            |
| Controlled <i>n</i> (%)          | 33 (73%)       | 0.064                | 14 (52%)       | 0.410                | 11 (41%)       | <b>0.006</b>         | <b>0.018</b>               |
| ACQ score                        | 1.6 ± 1.3      | 0.235                | 1.2 ± 0.8      | <b>0.016</b>         | 2 ± 1.2        | 0.380                | 0.053                      |
| <b>Exacerbations</b>             |                |                      |                |                      |                |                      |                            |
| <b>No</b>                        | 36 (80%)       | <b>0.012</b>         | 14 (52%)       | 1.0                  | 14 (52%)       | <b>0.012</b>         | <b>0.014</b>               |
| <b>1</b>                         | 5 (11%)        |                      | 9 (33%)        |                      | 4 (15%)        |                      |                            |
| <b>≥2</b>                        | 4 (9%)         |                      | 4 (15%)        |                      | 9 (33%)        |                      |                            |
| <b>Exacerbations number/year</b> | 0.3 ± 0.8      | <b>0.026</b>         | 0.6 ± 0.7      | 0.43                 | 1.0 ± 1.3      | <b>0.009</b>         | <b>0.010</b>               |
| <b>Comorbidities</b>             |                |                      |                |                      |                |                      |                            |
| Anxiety trait                    | 5 (11%)        | 0.062                | 8 (30%)        | 0.340                | 5 (19%)        | 0.490                | 0.143                      |
| Depression trait                 | 0              | <b>0.006</b>         | 5 (19%)        | 0.190                | 1 (4%)         | 0.380                | <b>0.005</b>               |
| <b>Treatment GINA steps</b>      | 2 ± 1          | 0.620                | 3 ± 1          | 0.090                | 3 ± 1          | <b>0.029</b>         | 0.067                      |

NS : never-smokers ; FS : former-smokers ; CS : current-smokers ; BMI : body mass index ; mMRC : Modified Medical Research Council scale; ACQ : Asthma Control Questionnaire; GINA: Global Initiative for Asthma guidelines. Data was showed as mean ± standard deviation (SD). Bold characters for the *p* value <0.05

**Table 2.** Lung function parameters of subjects with BMI >25 kg/m<sup>2</sup> according to smoking status.

|                    | NS<br>(n = 45) | <i>p</i><br>NS vs FS | FS<br>(n = 27) | <i>p</i><br>FS vs CS | CS<br>(n = 27) | <i>p</i><br>NS vs CS | <i>p</i><br>NS vs FS vs CS |
|--------------------|----------------|----------------------|----------------|----------------------|----------------|----------------------|----------------------------|
| FVC (L)            | 4.0 ± 1.0      | 0.720                | 3.9 ± 1.1      | 0.093                | 3.4 ± 1.3      | <b>0.026</b>         | 0.140                      |
| FVC (% predicted)  | 106 ± 19       | 0.170                | 99 ± 25        | 0.990                | 99 ± 24        | 0.270                | 0.300                      |
| FEV1 (L)           | 2.9 ± 0.9      | 0.130                | 2.6 ± 0.9      | 0.120                | 2.2 ± 1.1      | <b>0.007</b>         | <b>0.011</b>               |
| FEV1 (% predicted) | 92 ± 21        | 0.080                | 84 ± 20        | 0.420                | 77 ± 27        | <b>0.022</b>         | <b>0.026</b>               |

|                   |           |              |           |              |           |              |                  |
|-------------------|-----------|--------------|-----------|--------------|-----------|--------------|------------------|
| FEV1/FVC (%)      | 74 ± 10   | <b>0.025</b> | 68 ± 10   | 0.200        | 63 ± 13   | <b>0.001</b> | <b>&lt;0.001</b> |
| TLC (L)           | 5.8 ± 1.8 | 0.710        | 5.6 ± 1.6 | 0.660        | 5.5 ± 1.9 | 0.420        | 0.780            |
| TLC (% predicted) | 103 ± 22  | 0.410        | 98 ± 21   | 0.650        | 102 ± 23  | 0.930        | 0.710            |
| RV (% predicted)  | 110 ± 45  | 0.510        | 112 ± 30  | 0.440        | 123 ± 37  | 0.150        | 0.410            |
| DLCO (%)          | 96 ± 16   | <b>0.010</b> | 86 ± 11   | <b>0.046</b> | 92 ± 13   | 0.570        | <b>0.019</b>     |
| KCO (%)           | 103 ± 16  | 0.550        | 101 ± 16  | 0.720        | 100 ± 14  | 0.360        | 0.640            |

NS : never-smokers ; FS : former-smokers ; CS : current-smokers ; FVC : forced vital capacity ; L : liter ; FEV1 : forced expiratory volume in one seconde ; FEV1/FVC : ratio of forced expiratory volume in one seconde and forced vital capacity ; TLC : total lung capacity ; RV : residual volume ; DLCO : diffusion lung capacity for carbon monoxide ; KCO : ratio of DLCO and alveolar volume. Data was showed as mean ± standard deviation (SD). Bold characters for the *p* value <0.05

**Table 3.** Clinical characteristics of subjects with normal weight according to smoking status.

|                                        | NS<br>( <i>n</i> = 45) | <i>p</i><br>NS vs FS | FS<br>( <i>n</i> = 11) | <i>p</i><br>FS vs CS | CS<br>( <i>n</i> = 21) | <i>p</i><br>NS vs CS | <i>p</i><br>NS vs FS vs CS |
|----------------------------------------|------------------------|----------------------|------------------------|----------------------|------------------------|----------------------|----------------------------|
| <b>Gender (male)</b>                   | 9 (23%)                | <b>0.024</b>         | 7 (64%)                | 0.710                | 11 (52%)               | <b>0.022</b>         | <b>0.014</b>               |
| <b>Age (years)</b>                     | 45 ± 14                | 0.180                | 40 ± 10                | 0.570                | 37 ± 14                | <b>0.039</b>         | 0.084                      |
| <b>BMI (kg/m<sup>2</sup>)</b>          | 22 ± 2                 | 0.940                | 23 ± 1                 | 0.350                | 22 ± 26                | 0.430                | 0.560                      |
| <b>Family history</b>                  |                        |                      |                        |                      |                        |                      |                            |
| <i>n</i> (%)                           |                        |                      |                        |                      |                        |                      |                            |
| Asthma                                 | 6 (15%)                | <b>0.014</b>         | 6 (55%)                | 0.530                | 9 (43%)                | <b>0.019</b>         | <b>0.012</b>               |
| Atopy                                  | 7 (18%)                | <b>0.023</b>         | 6 (55%)                | 0.910                | 11 (52%)               | <b>0.006</b>         | <b>0.008</b>               |
| <b>Personal atopy<br/><i>n</i> (%)</b> | 20 (51%)               | <b>0.033</b>         | 10 (91%)               | <b>0.049</b>         | 11 (52%)               | 0.940                | 0.053                      |
| <b>Number of<br/>pack-year</b>         | 0                      | <b>&lt;0.001</b>     | 9.5 ± 6.9              | 0.340                | 11.9 ± 6.8             | <b>&lt;0.001</b>     | <b>&lt;0.001</b>           |
| <b>Asthma onset <i>n</i><br/>(%)</b>   |                        |                      |                        |                      |                        |                      |                            |
| Childhood                              | 17 (44%)               | 0.740                | 4 (36%)                | 0.260                | 12 (57%)               | 0.320                | 0.460                      |
| Adult                                  | 22 (56%)               |                      | 7 (64%)                |                      | 9 (43%)                |                      |                            |
| <b>Dyspnea</b>                         |                        |                      |                        |                      |                        |                      |                            |
| Presence <i>n</i> (%)                  | 13 (33%)               | 0.490                | 5 (45%)                | 0.720                | 8 (38%)                | 0.710                | 0.750                      |
| Degree mMRC                            | 0.8 ± 0.9              | 1                    | 0.8 ± 0.9              | 1                    | 0.8 ± 0.9              | 1                    | 1                          |
| <b>Asthma<br/>Control</b>              |                        |                      |                        |                      |                        |                      |                            |
| Controlled <i>n</i><br>(%)             | 29 (74%)               | 0.480                | 7 (64%)                | 0.260                | 9 (43%)                | <b>0.016</b>         | 0.054                      |
| ACQ score                              | 0.7 ± 0.8              | 0.211                | 1.3 ± 1.5              | 0.392                | 1.8 ± 1                | <b>0.003</b>         | <b>0.018</b>               |
| <b>Exacerbations</b>                   |                        |                      |                        |                      |                        |                      |                            |
| <b>No</b>                              | 30 (77%)               | 0.700                | 9 (82%)                | <b>0.009</b>         | 7 (33%)                | <b>&lt;0.001</b>     | <b>&lt;0.001</b>           |
| <b>1</b>                               | 4 (10%)                |                      | 0                      | 0                    | 0                      |                      |                            |
| <b>≥2</b>                              | 5 (13%)                |                      | 2 (18%)                | 14 (67%)             |                        |                      |                            |
| <b>Exacerbations<br/>number/year</b>   | 0.4 ± 0.8              | 0.820                | 0.4 ± 0.8              | <b>0.006</b>         | 1.7 ± 1.3              | <b>&lt;0.001</b>     | <b>&lt;0.001</b>           |
| <b>Comorbidities</b>                   |                        |                      |                        |                      |                        |                      |                            |
| Anxiety trait                          | 4 (10%)                | 1.0                  | 1 (9%)                 | 0.370                | 6 (29%)                | 0.140                | 0.180                      |
| Depression trait                       | 3 (8%)                 | 1.0                  | 0                      | 0.530                | 2 (10%)                | 1.0                  | 0.840                      |
| <b>Treatment<br/>GINA steps</b>        | 2.2 ± 1                | 0.840                | 2.2 ± 1                | 0.590                | 2.4 ± 1                | 0.530                | 0.800                      |

NS : never-smokers ; FS : former-smokers ; CS : current-smokers ; BMI : body mass index ; mMRC : Modified Medical Research Council scale ; ACQ : Asthma Control Questionnaire ; GINA : Global Initiative for Asthma guidelines. Data was showed as mean ± standard deviation (SD). Bold characters for the *p* value <0.05

**Table 4.** Lung function parameters of subjects with normal weight according to smoking status.

|                       | NS<br>(n = 45) | p<br>NS vs FS | FS<br>(n = 11) | p<br>FS vs CS | CS<br>(n = 21) | p<br>NS vs CS | p<br>NS vs FS vs<br>CS |
|-----------------------|----------------|---------------|----------------|---------------|----------------|---------------|------------------------|
| FVC (L)               | 3.9 ± 1.1      | 0.380         | 4.2 ± 0.8      | 0.810         | 4.1 ± 1.2      | 0.260         | 0.710                  |
| FVC (%<br>predicted)  | 111 ± 19       | 0.052         | 102 ± 10       | 0.800         | 101 ± 20       | <b>0.046</b>  | 0.073                  |
| FEV1 (L)              | 2.8 ± 1.0      | 0.900         | 2.8 ± 0.6      | 0.380         | 2.9 ± 1.1      | 0.390         | 0.950                  |
| FEV1 (%<br>predicted) | 95 ± 21        | <b>0.017</b>  | 81 ± 13        | 0.440         | 83 ± 22        | <b>0.045</b>  | <b>0.040</b>           |
| FEV1/FVC (%)          | 72 ± 10        | 0.170         | 67 ± 10        | 0.580         | 69 ± 11        | 0.400         | 0.430                  |
| TLC (L)               | 5.3 ± 1.9      | 0.380         | 5.7 ± 1.4      | 1.0           | 5.7 ± 1.1      | 0.110         | 0.540                  |
| TLC (%<br>predicted)  | 104 ± 28       | 0.680         | 106 ± 9        | 0.710         | 108 ± 17       | 0.830         | 0.820                  |
| RV (%<br>predicted)   | 127 ± 36       | 0.540         | 118 ± 22       | 0.130         | 108 ± 18       | <b>0.013</b>  | 0.088                  |
| DLCO (%)              | 93 ± 15        | 0.110         | 86 ± 9         | 0.890         | 89 ± 15        | 0.150         | 0.240                  |
| KCO (%)               | 97 ± 14        | 0.840         | 99 ± 19        | 0.490         | 97 ± 10        | 0.540         | 0.910                  |

NS : never-smokers ; FS : former-smokers ; CS : current-smokers ; FVC : forced vital capacity ; L : litter ; FEV1 : forced expiratory volume in one seconde ; FEV1/FVC : ratio of forced expiratory volume in one seconde and forced vital capacity ; TLC : total lung capacity ; RV : residual volume ; DLCO : diffusion lung capacity for carbon monoxide ; KCO : ratio of DLCO and alveolar volume. Data was showed as mean ± standard deviation (SD). Bold characters for the p-value <0.05
